# Supplementary material for: DNAH3 deficiency causes flagellar inner dynein arm loss and male infertility in humans and mice
Source: eLife journal article supplement (doi:10.7554/elife.96755), 2024-05-27
Supplement: fig4-figsupp1-data1 [file elife-96755-fig4-figsupp1-data1-v2.zip]

The image displays two gel electrophoresis panels. The top panel, labeled *Dnah3*, shows a DNA ladder on the left and 12 tissue samples on the right. The tissues are Brain, Heart, Liver, Intestine, Ovary, Lung, Uteru, Kidney, Testis, Epididymis, Stomach, and Spleen. A single band at 194 bp is visible in the Brain, Lung, and Testis lanes. The bottom panel, labeled *Actb*, shows a DNA ladder on the left and the same 12 tissue samples on the right. A single band at 157 bp is visible in all 12 tissue lanes, serving as a loading control.

| Tissue     | <i>Dnah3</i> (bp) | <i>Actb</i> (bp) |
|------------|-------------------|------------------|
| Brain      | 194               | 157              |
| Heart      |                   | 157              |
| Liver      |                   | 157              |
| Intestine  |                   | 157              |
| Ovary      |                   | 157              |
| Lung       | 194               | 157              |
| Uteru      |                   | 157              |
| Kidney     |                   | 157              |
| Testis     | 194               | 157              |
| Epididymis |                   | 157              |
| Stomach    |                   | 157              |
| Spleen     |                   | 157              |

*Dnah3*

P5 P10 P15 P20 P22 P25 P30 P42 P60

194 bp

*Actb*

157 bp
