# Supplementary material for: DNAH3 deficiency causes flagellar inner dynein arm loss and male infertility in humans and mice
Source: eLife. 2024 Nov 6;13:RP96755. doi: 10.7554/eLife.96755 (PMC11540302; doi:10.7554/eLife.96755)
Supplement: Figure 2—figure supplement 1—source data 1. [file elife-96755-fig2-figsupp1-data1.xlsx]

## Sheet: Sheet1
Figure 2—Figure supplement 1- source data 1. The percentage distribution of various flagellar morphology in the normal control and patients.
	Normal (%)	Irregular (%)	Bent (%)	Coiled (%)	Short (%)	Absent (%)
Normal Control	74.3	1.8	9.1	12.5	0	2.3
Patient 1	3.7	17.8	25.8	36.7	7.1	8.9
Patient 2	5.8	7.7	15.8	51.9	12.7	6.1
Patient 3	1.6	9.1	17.1	67.7	2.7	1.8
Patient 4	8.4	12.2	24.7	43.9	5.6	5.2
