# Supplementary figures and images for: DNAH3 deficiency causes flagellar inner dynein arm loss and male infertility in humans and mice
Source: eLife journal article supplement (doi:10.7554/elife.96755), 2024-05-27

**Figure 1D**

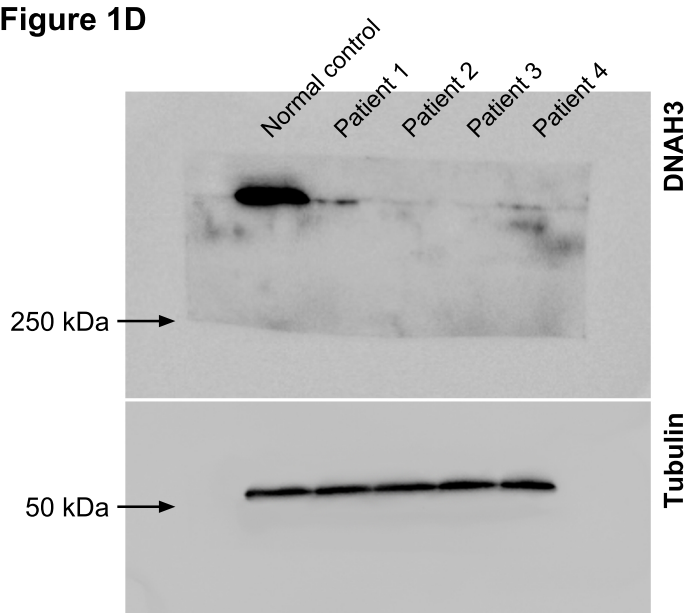

Supplement: fig1-data3 [file elife-96755-fig1-data3-v1.zip]

**Figure 5D****Figure 6D**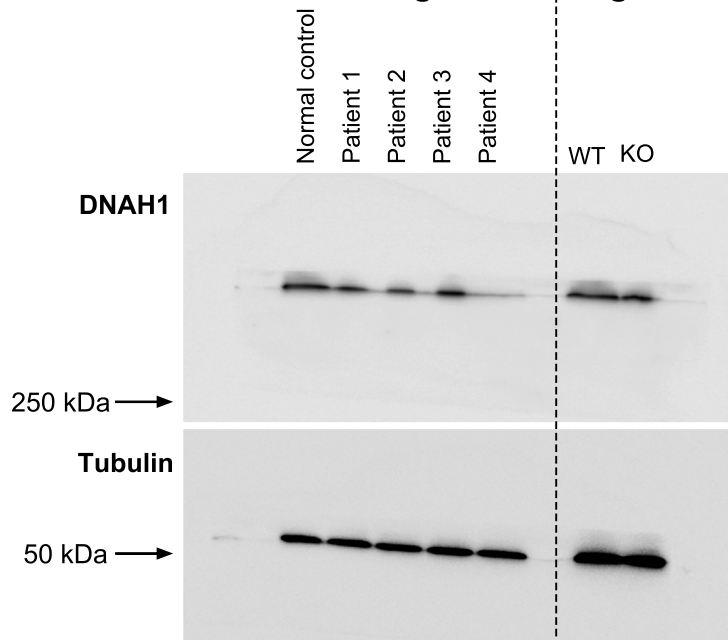**Figure 5E****Figure 6E**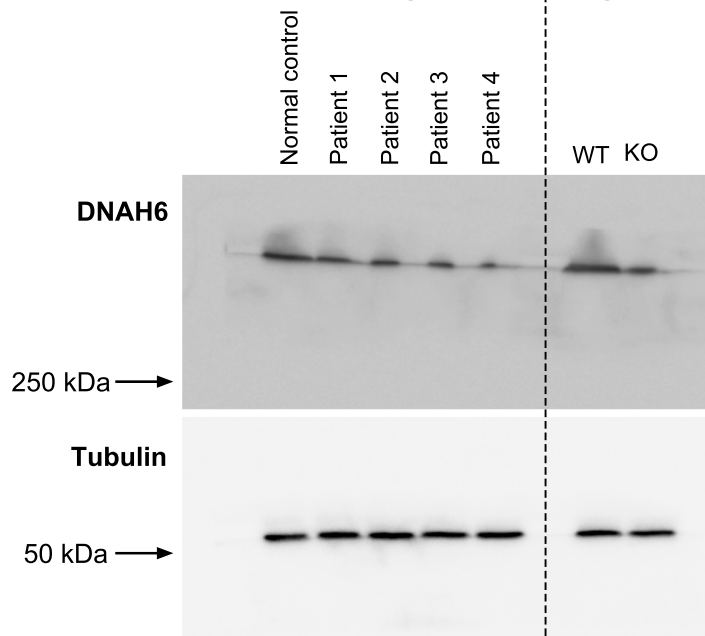**Figure 5F****Figure 6F**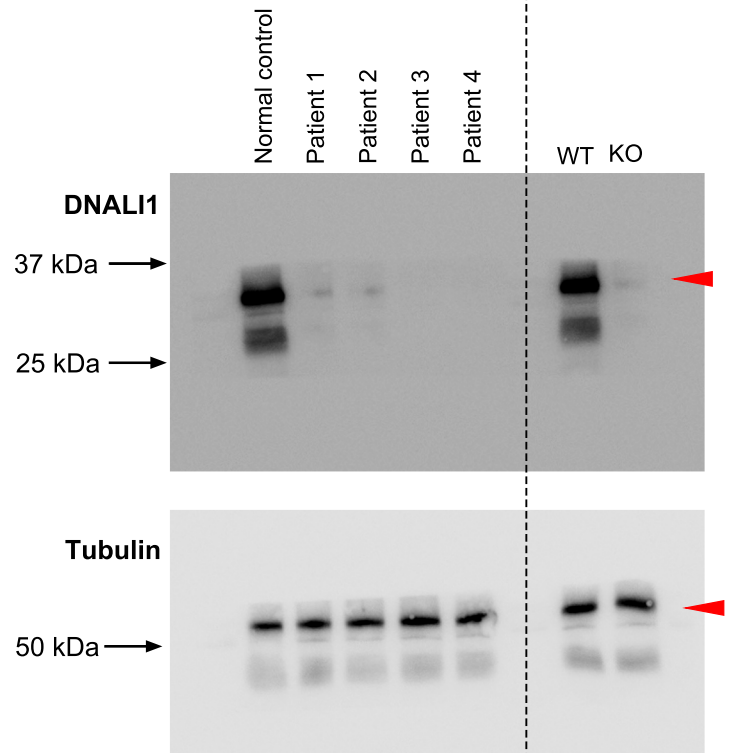

Supplement: fig5-data1 [file elife-96755-fig5-data1-v1.zip]
